# Supplementary material for: Serratus anterior plane block for minimal invasive heart surgery
Source: BMC Anesthesiol. 2018 Oct 20;18:144. doi: 10.1186/s12871-018-0614-5 (PMC6195730; doi:10.1186/s12871-018-0614-5)
Supplement: Supplementary file 1 — Data of SAPB versus CWI study. Additional file contains demographic data of patients, morphine consumption and post operative pain in the SABP and CWI groups. (XLSX 26 kb) [file 12871_2018_614_MOESM1_ESM.xlsx]

## Sheet: Groupe KT
Type ALR	Sexe	Age	poids	taille	IMC	asa	diabete	ATCD chir tho	BZD	Antalgie long cours	co morbidité respi	euroscore 2	Pre med gabapentine	keta	RVAo	RVM	PLASTIE Ao	plastie Mit	PAC	Duree	qt Sufenta	prélv mam.	durée intervention	temps CEC	temps clampage	delais arrivée rea / extu	1er levé	duree rea	duree hospi	Nausée/vommisement	mH0	mH6	mH24	mH48	mTotal	evaH0	evaH6	evaH24	evaH48	H6	H24	H48	H6	H24	H48	H6	H24	H48	VNI
0	1	70-79	76	164	28.257	3	0	0	0	1	0	0.0092	0	0	1	0	0	0	0	15.3	118	0	194	118	97	7.7	2	42.25	6	1	4	4	3	1	12	7	0	5	5	137	132	106	6	3	2	38	38	41	0
0	1	70-79	74	154	31.2026	3	0	0	0	0	0	0.0207	1	0	1	0	0	0	0	10.7	90	0	203	82	58	5.75	2	65	7	0	4	4	12	9	29	4	2	1	0	158	134	167	4	4	4	42	38	49	0
0	1	60-69	69	172	23.3234	3	0	0	0	0	0	0.0083	1	1	1	0	0	0	0	9	134	0	235	141	103	3.9	2	42	5	1	2	2	1	0	5	0	0	1	0	135	119	146	3	3	2	35	37	36	0
0	1	60-69	87	180	26.8519	3	0	0	0	0	0	0.0061	1	1	1	0	0	0	0	8.75	116	0	293	105	74	4.5	1	35.5	6	0	0	13	37	14	64	0	5	3	0	157	141	127	6	4	2	46	38	37	0
0	1	70-79	85	180	26.2346	3	0	0	0	0	1	0.0131	1	1	1	0	0	0	0	9.95	96	0	233	79	64	6.2	3	134.75	10	0	4	3	24	5	36	3	5	5	2	70	114	77	6	10	4	37	41	42	1
0	2	60-69	67	158	26.8386	3	1	0	0	0	0	0.0244	1	0	1	0	0	0	0	7.25	65	0	153	114	81	3	1	64	9	0	5	5	12	3	25	6	0	0	0	120	122	119	3	1	1	41	35	36	0
0	1	50-59	66	178	20.8307	3	0	0	0	0	0	0.006	1	0	0	1	0	0	0	11.5	133	0	342	117	89	4.5	1	89	9	1	4	1	0	0	5	7	1	6	0	187	102	129	4	2	2	39	30	36	0
0	2	80-89	82	168	29.0533	3	0	0	0	0	0	0.011	1	0	1	0	0	0	0	8.5	105	0	186	102	88	4	1	28	8	1	4	0	5	7	16	5	0	2	0	****	111	96	6	4	0	*****	36	37	0
0	2	70-79	60	165	22.0386	3	0	0	0	0	0	0.0062	1	0	1	0	0	0	0	9.9	113	0	227	134	93	4.4	3	95.5	10	1	8	14	12	5	39	7	2	0	0	145	99	158	4	2	2	45	45	37	1
0	2	70-79	66	153	28.1943	3	0	0	1	0	0	0.0215	1	0	1	0	0	0	0	11.75	72	0	138	79	54	5.95	1	39.25	9	1	8	2	0	0	10	5	5	0	0	280	131	165	5	3	2	56	52	46	1
0	2	60-69	70	170	24.2215	3	0	0	0	0	0	0.007	1	0	1	0	0	0	0	8.25	98	0	179	114	88	3.95	1	16.25	8	0	6	3	0	0	9	6	3	0	0	141	117	****	4	2	2	48	42	****	0
0	1	60-69	91	182	27.4725	3	0	0	0	0	0	0.0099	1	0	1	0	0	0	0	6.2	168	0	170	81	58	2.6	1	25.75	8	0	5	2	15	9	31	5	2	0	0	102	82	80	4	4	2	43	42	42	0
0	2	70-79	89	159	35.2043	3	1	1	1	1	0	0.0092	1	0	1	0	0	0	0	10.5	93	0	158	70	48	6.25	1	23.25	8	0	4	3	0	0	7	6	2	2	0	177	****	****	5	0	0	30	****	****	0
0	1	60-69	78	174	25.763	3	0	0	0	0	0	0.0178	1	1	1	0	0	0	0	8.5	103	0	136	88	68	4	2	59	6	0	8	1	2	0	11	4	0	0	0	92	88	91	5	3	1	36	38	38	0
0	1	70-79	92	178	29.0367	3	1	0	0	0	0	0.0353	1	1	1	0	0	0	0	7.25	128	0	239	150	107	4.25	1	22.75	7	0	7	5	4	0	16	5	5	0	1	93	98	****	5	4	0	37	39	****	0
0	2	80-89	68	152	29.4321	3	0	0	0	0	0	0.0196	1	1	1	0	0	0	0	9.5	85	0	158	82	59	5.7	2	68.5	10	0	4	4	0	0	8	0	0	0	0	143	174	83	8	6	4	32	34	31	0
0	1	60-69	94	174	31.0477	3	1	0	0	0	0	0.0198	1	0	1	0	0	0	0	16	97	0	192	92	60	12.7	2	74	10	0	10	2	0	0	12	****	0	0	0	84	110	102	5	5	2	35	32	35	0
0	1	70-79	72	163	27.0993	3	0	0	0	0	0	0.0126	1	0	1	0	0	0	0	8.95	102	0	184	81	62	4.25	2	98.9	9	0	3	3	24	5	35	0	2	0	0	127	91	80	6	6	5	44	38	41	1
0	1	50-59	81	171	27.7008	3	0	0	0	0	0	0.0262	1	0	0	0	0	1	0	12.6	115	0	208	188	107	7.4	2	22.25	8	0	8	8	16	14	46	8	0	0	7	209	100	****	8	4	2	39	41	****	0
0	1	50-59	132	177	42.1335	3	0	0	0	0	1	0.007	1	0	1	0	0	0	0	9.5	104	0	193	96	60	5.75	1	39.9	8	0	4	19	2	0	25	8	0	0	4	59	95	62	5	5	0	61	63	37	1
0	1	50-59	84	178	26.5118	3	0	0	0	0	0	0.0056	1	0	1	0	0	0	0	7.6	87	0	159	105	89	3.5	2	24.2	7	1	7	11	28	0	46	5	3	4	2	148	143	134	5	4	0	41	44	42	0
0	1	60-69	71	177	22.6627	3	0	1	0	0	1	0.0082	1	1	1	0	0	0	0	9.6	82	0	191	101	81	4.9	1	15.9	8	0	5	15	3	2	25	7	6	3	2	141	****	****	5	2	2	41	****	****	0
0	1	20-29	86	182	25.963	4	0	1	0	0	0	0.0276	1	0	0	1	0	0	0	11.4	191	0	256	149	127	5.5	2	127	10	0	8	11	36	0	55	6	1	5	0	88	122	155	2	4	4	45	38	41	0
0	1	60-69	70	175	22.8571	3	0	1	0	0	1	0.0098	1	1	1	0	0	0	0	9	82	0	191	101	81	4.3	1	19	9	0	6	7	3	1	17	5	0	0	2	140	99	****	4	2	2	40	39	****	0
0	1	60-69	82	182	24.7555	3	0	0	0	0	0	0.0135	1	0	0	1	0	0	0	9.6	92	0	178	100	82	5	2	40.1	****	1	10	17	14	4	45	6	5	4	3	119	****	****	4	4	2	38	****	****	0
0	2	80-89	68	154	28.6726	3	0	0	0	0	0	0.025	1	0	0	1	0	0	0	12.7	119	0	219	128	98	7.3	2	69	5	0	4	2	5	0	11	5	4	3	0	137	101	106	4	3	3	39	34	33	1
1	2	70-79	90	156	36.9822	3	1	0	0	0	1	0.0329	1	1	1	0	0	0	0	8.7	92	0	147	72	53	4.5	1	39	5	0	1	6	3	10	20	8	0	0	4	115	82	100	8	8	5	40	44	40	1
1	2	70-79	66	157	26.7759	3	0	0	0	0	1	0.0188	1	1	1	0	0	0	0	9.7	81	0	145	107	49	6.2	1	52	6	0	2	7	0	0	9	0	4	0	0	135	117	102	8	4	3	36	40	41	0
1	1	70-79	98	176	31.6374	3	0	0	0	0	0	0.008	1	0	0	0	0	1	0	7.5	127	0	215	128	104	4	1	16.25	6	0	0	4	0	0	4	0	0	0	0	129	113	****	4	2	0	38	43	****	0
1	1	50-59	74	178	23.3556	3	0	0	0	0	0	0.0056	0	1	1	0	0	0	0	7.9	91.5	0	190	109	94	5.6	1	23.7	5	0	4	6	18	0	28	6	4	6	0	186	148	****	4	2	0	50	49	****	0
1	2	60-69	49	160	19.1406	3	0	0	0	0	0	0.0083	1	0	1	0	0	0	0	8.9	102	0	134	75	61	5.4	4	177	13	1	2	9	1	1	13	0	5	0	0	160	114	146	3	3	2	41	37	25	0
1	1	60-69	74	184	21.8573	3	0	0	0	0	0	0.005	1	0	0	0	0	1	0	8.75	95	0	216	160	118	4.5	1	69.8	8	0	4	12	11	8	35	6	0	2	2	161	168	115	4	4	2	43	46	42	0
1	1	70-79	82	168	29.0533	3	0	0	0	0	0	0.0164	1	1	1	0	0	0	0	10.4	92	0	166	99	86	6.1	1	25.5	8	0	0	1	0	0	1	0	0	0	0	****	124	****	5	2	0	****	37	****	0
1	1	50-59	73	173	24.3911	3	0	0	0	0	0	0.005	1	0	0	0	0	1	0	9.4	150	0	216	129	101	3.4	1	17.7	8	0	3	4	8	0	15	0	0	7	0	269	151	****	8	5	0	33	49	****	0
1	1	70-79	93	170	32.1799	3	1	0	0	0	1	0.0093	1	0	1	0	0	0	0	9.5	118	0	177	100	65	5.5	1	21.75	4	0	2	2	0	0	4	0	0	0	0	93	79	****	5	2	0	33	34	****	0
1	1	70-79	95	182	28.6801	3	1	0	0	0	0	0.0116	1	1	1	0	0	0	0	8.4	87	0	168	112	78	4.25	1	25.7	4	0	0	3	0	0	3	4	0	2	0	132	150	****	4	2	0	26	25	****	0
1	2	60-69	96	160	37.5	3	1	0	0	0	1	0.0085	1	0	1	0	0	0	0	16.8	122	0	171	105	75	12	1	97	11	1	1	4	4	2	11	0	3	0	1	180	75	87	5	3	3	44	44	41	1
1	2	70-79	50	155	20.8117	3	0	0	0	0	0	0.0158	1	1	1	0	0	0	0	8.5	105	0	223	122	108	3.5	1	52.8	6	1	2	2	0	0	4	2	0	0	0	157	109	95	4	3	2	37	34	36	0
1	1	60-69	105	178	33.1398	3	0	0	0	0	0	0.007	1	1	1	0	0	0	0	7.9	129	0	203	122	91	3.3	1	15.5	5	0	4	4	2	0	10	3	1	0	0	109	19	****	4	4	0	40	40	****	0
1	2	50-59	69	160	26.9531	3	0	0	0	0	0	0.0204	1	0	1	0	0	0	0	10.25	109	0	206	139	115	5.25	2	18.8	11	0	3	6	2	0	11	3	6	0	0	104	75	104	5	5	5	37	39	34	1
1	2	60-69	63	165	23.1405	3	0	0	0	0	0	0.0094	1	0	0	0	0	1	0	9.75	125	0	235	177	160	6.25	1	24.25	6	1	10	6	4	0	21	6	0	2	5	127	98	****	5	2	0	49	39	****	0
1	2	70-79	75	160	29.2969	3	0	0	0	0	0	0.0106	1	0	1	0	0	0	0	8.3	98	0	186	100	82	4	1	17	6	0	4	5	3	0	51	0	2	4	4	131	96	****	5	2	0	39	35	****	0
1	1	60-69	100	179	31.21	3	1	0	0	0	0	0.0057	1	0	0	0	0	0	1	13.8	154	1	225	****	****	3.1	1	19.8	5	0	0	10	7	0	17	0	0	0	0	123	103	****				44	42	****	0
1	2	60-69	71	156	29.1749	2	0	0	0	0	0	0.0083	1	0	1	0	0	0	0	9.7	107	0	158	90	63	4.4	1	23.5	6	0	2	2	6	0	10	0	0	0	2	163	179	****	4	4	0	36	32	****	0
1	2	80-89	75	158	30.0433	3	0	0	0	0	0	0.034	1	0	1	0	0	0	0	9	143	0	198	117	62	6.3	1	20.25	7	0	0	2	4	0	6	0	0	4	0	77	156	****	4	4	2	44	36	****	0
1	1	50-59	64	171	21.8871	0	0	0	0	0	0	0.0067	1	0	0	0	0	1	0	9.95	139	0	224	164	118	6.25	2	****	****	0	0	4	2	0	6	0	0	0	****	157	140	****	4	0	0	44	45	****	0
[truncated: 9 more columns]
